# Supplementary material
Source: publisher figshare collection journal article supplement (https://asha.figshare.com/articles/dataset/_/23971929)
Supplement: Supplementary file 1 [file 1]

**Supplemental Material S5. Sound Production Treatment protocol.**

| <b>Sound Production Treatment</b>                                                                                                                                                                                                                                                                                                                                                                                                                                                                                                                                                                                                                                                      |                   |
|----------------------------------------------------------------------------------------------------------------------------------------------------------------------------------------------------------------------------------------------------------------------------------------------------------------------------------------------------------------------------------------------------------------------------------------------------------------------------------------------------------------------------------------------------------------------------------------------------------------------------------------------------------------------------------------|-------------------|
| <b>Coded session number</b>                                                                                                                                                                                                                                                                                                                                                                                                                                                                                                                                                                                                                                                            |                   |
| <b>General observations</b>                                                                                                                                                                                                                                                                                                                                                                                                                                                                                                                                                                                                                                                            | <b>Plus/minus</b> |
| All 16 targets were treated during the session                                                                                                                                                                                                                                                                                                                                                                                                                                                                                                                                                                                                                                         |                   |
| The clinician was sitting facing the participant                                                                                                                                                                                                                                                                                                                                                                                                                                                                                                                                                                                                                                       |                   |
| There was minimal background noise or distraction during the session.                                                                                                                                                                                                                                                                                                                                                                                                                                                                                                                                                                                                                  |                   |
| Correct production elicited 5x (in majority of session)                                                                                                                                                                                                                                                                                                                                                                                                                                                                                                                                                                                                                                |                   |
| Specific cueing hierarchy followed in majority of session (below)                                                                                                                                                                                                                                                                                                                                                                                                                                                                                                                                                                                                                      |                   |
| Number of trials with explicit feedback related to rate and/or rhythm of production (e.g., "Slowly")                                                                                                                                                                                                                                                                                                                                                                                                                                                                                                                                                                                   |                   |
| <b>Measure</b>                                                                                                                                                                                                                                                                                                                                                                                                                                                                                                                                                                                                                                                                         | <b>Number</b>     |
| Duration of treatment session                                                                                                                                                                                                                                                                                                                                                                                                                                                                                                                                                                                                                                                          |                   |
| Number of trials offered in the treatment session                                                                                                                                                                                                                                                                                                                                                                                                                                                                                                                                                                                                                                      |                   |
| Number of trials that skipped or missed a level in the hierarchy                                                                                                                                                                                                                                                                                                                                                                                                                                                                                                                                                                                                                       |                   |
| Additional Comments                                                                                                                                                                                                                                                                                                                                                                                                                                                                                                                                                                                                                                                                    |                   |
| <p style="text-align: center;"><b>Cueing hierarchy</b></p> <ol style="list-style-type: none"> <li>1. The clinician will state the target word and ask for repetition using the carrier phrase, "I say..."</li> <li>2. The clinician will write the target sound, underlining the sound in error, repeat the word, and request repetition.</li> <li>3. The clinician will use the integral stimulation cues, "watch me, listen to me, say it with me," and ask the participant to produce the target (up to three times).</li> <li>4. The clinician will provide articulatory placement cues for the production in error and use integral stimulation to request repetition.</li> </ol> |                   |

Based on Wambaugh, J. L., Nessler, C., Cameron, R., & Mauszycki, S. C. (2013). Treatment for acquired apraxia of speech: Examination of treatment intensity and practice schedule. *American Journal of Speech-Language Pathology*, 22(1), 84–102. [https://doi.org/10.1044/1058-0360\(2012/12-0025\)](https://doi.org/10.1044/1058-0360(2012/12-0025))
