# Supplementary material
Source: publisher figshare collection journal article supplement (https://asha.figshare.com/articles/dataset/_/23971929)
Supplement: Supplementary file 2 [file 1]

**Supplemental Material S3.** Target, response generalization, and stimulus generalization items for each participant.

P1

| Target       | Response generalization | Stimulus generalization          |
|--------------|-------------------------|----------------------------------|
| Set 1        |                         |                                  |
| Thankfulness | Thickheaded             | She expressed her thankfulness.  |
| Theater      | Thematic                | They went to the theater.        |
| Therapy      | Thinkable               | She went to her therapy.         |
| Thoroughly   | Thunderbird             | He enjoyed it thoroughly.        |
| Thundercloud | Thoughtfully            | She saw the large thundercloud.  |
| Thesaurus    | Thalamus                | She checked in the thesaurus.    |
| Thickener    | Thoracic                | We need to add thickener.        |
| Thirty-two   | Thumpingly              | She was only thirty-two.         |
| Zeppelin     | Zippering               | She saw a big zeppelin.          |
| Zookeeper    | Zeroing                 | They heard from the zookeeper.   |
| Zillionaires | Zimbabwe                | They all felt like zillionaires. |
| Zucchini     | Zanzibar                | We need to buy zucchini.         |
| Zodiac       | Zealotries              | She checked her new zodiac.      |
| Zambia       | Zaratite                | We flew over Zambia.             |
| Zachary      | Zonation                | His son is named Zachary.        |
| Zaniness     | Zinnia                  | Her friend had some zaniness.    |
| Set 2        |                         |                                  |
| Gardening    | Gooseberry              | She loved summer gardening.      |
| Gathering    | Guardian                | They enjoyed a gathering.        |
| Gondola      | Guarantee               | He rode up the gondola.          |
| Gorilla      | Guinea Pig              | We saw the large gorilla.        |
| Galoshes     | Galloping               | He put on his galoshes.          |
| Gallery      | Guillotine              | She opened the gallery.          |
| Gasoline     | Gullible                | We need to get gasoline.         |
| Garrulous    | Gallbladder             | She was often garrulous.         |

|               |                |                                |
|---------------|----------------|--------------------------------|
| Slippery      | Sweetbriar     | The railing was slippery.      |
| Stenciling    | Swampiness     | She enjoyed her stenciling.    |
| Sleepiness    | Slithering     | He felt extreme sleepiness.    |
| Skillfully    | Scholastic     | He played keyboard skillfully. |
| Statistics    | Scatterbrain   | We learned about statistics.   |
| Sweltering    | Stereo         | The weather was sweltering.    |
| Schoolteacher | Sleepwalker    | He became a schoolteacher.     |
| Swimmingly    | Standalone     | The party went swimmingly.     |
| Set 3         |                |                                |
| Vacation      | Venomous       | They went on a vacation.       |
| Valentine     | Virtuous       | She bought him a valentine.    |
| Vanilla       | Virginia       | She put in some vanilla.       |
| Veteran       | Vertical       | He became a veteran.           |
| Volcano       | Vacancy        | They saw a big volcano.        |
| Victory       | Volleyball     | Her team had a victory.        |
| Video         | Vaccinate      | They watched an old video.     |
| Vehicle       | Vitamin        | She bought a new vehicle.      |
| Farsighted    | Foreshadow     | She knew he was farsighted.    |
| Fictional     | Featherbrained | The person was fictional.      |
| Foolhardy     | Functional     | He might have been foolhardy.  |
| Fortified     | Forgeable      | The building was fortified.    |
| Familiar      | Fortunate      | He was mostly familiar.        |
| Fellowship    | Fashioning     | They enjoyed the fellowship    |
| Fermenting    | Facetious      | The miso was fermenting.       |
| Fulfillment   | Federal        | She had plenty fulfillment.    |

P2

| <i>Target</i> | <i>Response Generalization</i> | <i>Stimulus Generalization</i> |
|---------------|--------------------------------|--------------------------------|
| <i>Set 1</i>  |                                |                                |
| Punish        | Finish                         | She did not punish.            |
| Catfish       | Vanish                         | I want the catfish.            |
| Eyelash       | Abash                          | She had an eyelash.            |
| Polish        | Eyewash                        | She liked the polish.          |
| Publish       | Backwash                       | He waits to publish.           |
| English       | Unleash                        | They all spoke English.        |
| Boyish        | Anguish                        | He was quite boyish.           |
| Ticklish      | Vanquish                       | She was not ticklish.          |
| Poem          | Bosom                          | She wrote a poem.              |
| Mayhem        | Venom                          | He causes mayhem.              |
| Totem         | Victim                         | She keeps a totem.             |
| Emblem        | Moonbeam                       | It was an emblem.              |
| Album         | Atom                           | He made an album.              |
| Bottom        | Maxim                          | She hurt her bottom.           |
| Item          | Vacuum                         | That's a nice item.            |
| Gingham       | Abloom                         | She likes the gingham.         |
| <i>Set 2</i>  |                                |                                |
| stopping      | Staging                        | It wasn't stopping.            |
| Staple        | Status                         | She used a staple.             |
| staying       | Stalky                         | I won't be staying.            |
| stinging      | Stately                        | The bee is stinging.           |
| stopgap       | stovetop                       | It was a stopgap.              |
| Stitching     | stubble                        | Mind the nice stitching.       |
| Statue        | Stinky                         | There was a statue.            |

|            |           |                        |
|------------|-----------|------------------------|
| Sticky     | Step-up   | Honey gets sticky.     |
| Thicken    | Thicket   | It needs to thicken.   |
| Thinking   | Thighbone | He got to thinking.    |
| Thawing    | Thieving  | It was out thawing.    |
| Thoughtful | Thinning  | You are so thoughtful. |
| Thank you  | Thankful  | He told her thank you. |
| Thinly     | Thickly   | Keep it on thinly.     |
| Thatching  | Thinktank | He was up thatching.   |
| Theo       | Thetic    | His name is Theo.      |
| Set 3      |           |                        |
| Gravy      | Griffin   | I will have gravy.     |
| Grazing    | Grantor   | The cow was grazing.   |
| Grapple    | Graying   | He had to grapple.     |
| Greener    | Greater   | The room is greener.   |
| Graphic    | Growler   | He saw the graphic.    |
| Grouper    | Grabbing  | She ate the grouper.   |
| Granite    | Grading   | It looks like granite. |
| Grouchy    | Grafted   | He was now grouchy.    |
| Husband    | Vivid     | This is her husband.   |
| Beaded     | Needed    | The pants were beaded. |
| Ahead      | Wanted    | He kept on ahead.      |
| Zip code   | Annoyed   | She knew her zip code. |
| Wounded    | Decade    | He was not wounded.    |
| Gifted     | Divide    | Her son is gifted.     |
| Dog food   | Junk food | We need more dog food. |
| Heeded     | Peapod    | Advice was heeded.     |

P3

| Target     | Response Generalization | Stimulus Generalization        |
|------------|-------------------------|--------------------------------|
| Set 1      |                         |                                |
| Galaxy     | Gaslighting             | She saw the whole galaxy.      |
| Goldilocks | Gutsily                 | They read the book Goldilocks. |
| Gambia     | Gaugeable               | He visited Gambia.             |
| Gazpacho   | Galactic                | They had a cold gazpacho.      |
| Galoshes   | Gadabout                | He put on his galoshes.        |
| Galloping  | Getable                 | The big horse was galloping.   |
| Gossiping  | Gullible                | He heard them all gossiping.   |
| Guidable   | Giddily                 | She was very guidable.         |
| Vacation   | Vocation                | They went on a vacation.       |
| Vivacious  | Visible                 | She was always vivacious.      |
| Visual     | Validate                | She liked the large visual.    |
| Viola      | Vocalist                | He played the old viola.       |
| Vividly    | Vacated                 | They saw it all vividly.       |
| Viable     | Volleyball              | The project was viable.        |

|               |              |                                   |
|---------------|--------------|-----------------------------------|
| Video         | Vilify       | They watched the long video.      |
| Vehicle       | Vestibule    | She bought a new vehicle.         |
| Set 2         |              |                                   |
| Radius        | Receiver     | We were near the radius.          |
| Recycle       | Republic     | They needed to recycle.           |
| Remember      | Rhodium      | I wanted to remember.             |
| Radio         | Rosary       | That is just the radio.           |
| Register      | Respectful   | He added a remedy.                |
| Replica       | Raspberry    | He typed on the register.         |
| Rejected      | Relative     | They saw a large replica.         |
| Remedy        | Rebecca      | She learned she was rejected.     |
| Noisily       | Nastiness    | He was working noisily.           |
| Nightingale   | Nautical     | She saw a nice nightingale.       |
| Nebulous      | Noticing     | The reason was nebulous.          |
| Notation      | National     | We saw the old notation.          |
| Nemesis       | Nonfiction   | He is my main nemesis.            |
| Nicknaming    | Noxiousness  | She is always nicknaming.         |
| Nippiness     | Nobody       | She knew about nippiness.         |
| Nicety        | Nobleness    | It was a small nicety.            |
| Set 3         |              |                                   |
| Thinking cap  | Thematic     | She put on her thinking cap.      |
| Thoughtlessly | Thinkable    | He was driving thoughtlessly.     |
| Thumbtacking  | Thalassic    | They were out there thumbtacking. |
| Thimbleweeds  | Theatric     | She was out in thimbleweeds.      |
| Thanklessly   | Thoughtfully | The waiter did it thanklessly.    |
| Thickheaded   | Thalamus     | She was always thickheaded.       |
| Theistic      | Thalluses    | The beliefs were theistic.        |
| Thicketed     | Thumpingly   | The space there was thicketed.    |

P4

| <i>Target</i> | <i>Response Generalization</i> | <i>Stimulus Generalization</i> |
|---------------|--------------------------------|--------------------------------|
| Set 1         |                                |                                |
| Shutterbug    | Demagog                        | She was a big shutterbug.      |
| Carpetbag     | Antilog                        | I kept the old carpetbag.      |
| Catalog       | Caprfig                        | It was in a catalog.           |
| Underdog      | Whirligig                      | He's always the underdog.      |
| Polliwog      | Overbig                        | I just found a polliwog!       |
| Pettifog      | Tumblebug                      | He would rather pettifog.      |

|               |                        |                                  |
|---------------|------------------------|----------------------------------|
| Lollygag      | Ladybug                | We don't need to lollygag.       |
| Waterdog      | Saddlebag              | I found a young waterdog.        |
| Acknowledge   | Undercarriage/Ecolodge | I would like to acknowledge.     |
| Featheredge   | Nonvintage             | He just used the featheredge.    |
| Disparage     | Repackage              | I don't mean to disparage.       |
| Prearrange    | Advantage              | We will need to prearrange.      |
| Supercharge   | Patronage              | The car can hold supercharge.    |
| Percentage    | Anchorage              | He gave me a percentage.         |
| Disengage     | Cartilage              | He needed to disengage.          |
| Hermitage     | Orphanage              | She went to the hermitage.       |
| Set 2         |                        |                                  |
| Scandalous    | Skateboarder           | That was very scandalous!        |
| Schoolteacher | Skeleton               | We have a great schoolteacher.   |
| Scatterbrain  | Skillfully             | I am such a scatterbrain.        |
| Scorekeeper   | Skittishness           | He was a great scorekeeper.      |
| Scholarship   | Skywriting             | He just won a scholarship.       |
| Scaffolding   | Skydiving              | There is enough scaffolding.     |
| Scattering    | Scholastic             | We saw them all scattering.      |
| Skyrocket     | Scornfulness           | The cost starts to skyrocket.    |
| Aftermath     | Supergrowth            | They did not see aftermath.      |
| Cottonmouth   | Neuropath              | I saw a big cottonmouth.         |
| Coppersmith   | Ironsmith              | We will need a coppersmith.      |
| Undergrowth   | Hydropath              | There was plenty undergrowth.    |
| Seventeenth   | Behemoth               | I just came in seventeenth.      |
| Tablecloth    | Hyacinth               | We need a big tablecloth.        |
| Pennyworth    | Telepath               | We could have a pennyworth.      |
| Motormouth    | Overlength             | She was a real motormouth.       |
| Set 3         |                        |                                  |
| Zeppelin      | Zippering              | She saw a big zeppelin.          |
| Zookeeper     | Zeroing                | They heard from the zookeeper.   |
| Zillionaires  | Zimbabwe               | They all felt like zillionaires. |
| Zucchini      | Zanzibar               | We need to buy zucchini.         |
| Zodiac        | Zealotries             | She checked her new zodiac.      |
| Zambia        | Zaratite               | We flew over Zambia.             |

|          |          |                               |
|----------|----------|-------------------------------|
| Zachary  | Zonation | His son is named Zachary.     |
| Zaniness | Zinnia   | Her friend had some zaniness. |
