# Supplementary material
Source: publisher figshare collection journal article supplement (https://asha.figshare.com/articles/dataset/_/23971929)
Supplement: Supplementary file 3 [file 1]

## **Supplemental Material S2. Selection criteria for investigation.**

All met the following selection inclusion criteria:

- (a) diagnosis of AOS,
- (b) at least 6-months post-onset of diagnosis per self-report and/or medical records
- (c) ability to produce or approximate words at the bisyllabic level from auditory or written prompts as per SLP judgment,
- (d) adequate hearing for participation in the study based on self-report and/or audiometric screening (passing at 40 dB at 500, 1000, and 2000 Hz). For all individuals who were recruited, they were offered an audiometric screening. Each individual involved in the study self-reported no significant hearing impairment (in the presence of family), and did not elect to complete a screening,
- (e) adequate cognition for participation in the study, defined by a standard score greater than 78 on the Test of Nonverbal Intelligence-4 (TONI-4; Brown et al., 2010), and
- (f) English as the primary language per self-report.

The exclusion criteria were as follows:

- (a) profound aphasia, based on an Aphasia Quotient <25 on the Western Aphasia Battery-Revised (WAB-R; Kertesz, 2006),
- (b) severe concomitant dysarthria per the clinical judgment of the SLP based on both an oral motor evaluation and auditory-perceptual assessment of speech during various tasks (including discourse production, consonant probe, and diadochokinetic tasks),
- (c) prior history of speech or language disorders before the onset of AOS, based on self-report,
- (d) significant depression as indicated by a score of  $\geq 10$  on the short form of the Geriatric Depression Scale (GDS-15; Sheik & Yesavage, 1986), and
- (e) participation in other speech therapy focused on AOS concurrent with the present investigation.

## References

- Brown, L., Shechenou, R. J., & Johnsen, S. K. (2010). *Test of nonverbal intelligence-4 (TONI-4)*. PRO-ED.
- Kertesz, A. (2006). *Western Aphasia Battery-Revised (WAB-R)*. Pearson.
- Sheikh, J. I., & Yesavage, J. A. (1986). Geriatric Depression Scale (GDS): Recent evidence and development of a shorter version. *Clinical Gerontologist: The Journal of Aging and Mental Health*, 5(1-2), 165–173. [https://doi.org/10.1300/J018v05n01\\_09](https://doi.org/10.1300/J018v05n01_09)
