# Supplementary material
Source: publisher figshare collection journal article supplement (https://asha.figshare.com/articles/dataset/_/23971929)
Supplement: Supplementary file 4 [file 1]

#### Supplemental Material S4. Whole word correctness scoring system.

| Score 0                                                 | Response/Target      | Score 1                                                           | Response/Target    |
|---------------------------------------------------------|----------------------|-------------------------------------------------------------------|--------------------|
| More than one articulatory error or distortion          | /tisʌm/ (season)     | Minor consonant errors (no more than one feature from the target) | /zisʌn/ (zeason)   |
| Omission of a sound/syllable                            | /sisʌ/ (seas-uh)     | Excessive lengthening                                             | /si:sʌn/ (sea:son) |
| Addition of a sound/syllable                            | /sisʌnʌ/ (season-uh) | Incorrect stress pattern or syllable segregation                  | /siSʌN/ (seaSON)   |
| Vowel substitution                                      | /saisʌn/ (sigh-son)  | Vowel distortion (sounds like a poor exemplar of the target)      | /sisʌn/ (i~l)      |
| Consonant error (more than one feature from the target) | /sidʌn/ (seadon)     |                                                                   |                    |
| Vowel or consonant error with prosodic error            | /sid: ʌn/ (sea: don) |                                                                   |                    |
| Unintelligible production                               |                      |                                                                   |                    |
| Greater than 1 prosodic error                           | /s:i:dʌn/ (s:ea:don) |                                                                   |                    |

*Note.* Whole word correctness as measured using the 3-point scoring system described by Strand et al. (2006) and extended to incorporate prosodic features by Maas and Farinella (2012). A score of 2 reflects a response without errors.

#### References

- Maas, E., & Farinella, K. (2012). Random versus blocked practice in treatment for childhood apraxia of speech. *Journal of Speech, Language, and Hearing Research*, 55(2), 561–578. [https://doi.org/10.1044/1092-4388\(2011/11-0120\)](https://doi.org/10.1044/1092-4388(2011/11-0120))
- Strand, E. A., Stoeckel, R., & Baas, B. (2006). Treatment of severe childhood apraxia of speech: A treatment efficacy study. *Journal of Medical Speech–Language Pathology*, 14(4), 297–307.
