# Supplementary material
Source: publisher figshare collection journal article supplement (https://asha.figshare.com/articles/dataset/_/23971929)
Supplement: Supplementary file 6 [file 1]

**Supplemental Material S1. Speech features: Apraxia of Speech Rating Scale 3.0.**

| <b>ASRS Speech Feature</b> | <b>P1</b> | <b>P2</b> | <b>P3</b> | <b>P4</b> |
|----------------------------|-----------|-----------|-----------|-----------|
| 1                          | 2         | 3         | 3         | 2         |
| 2                          | 2         | 4         | 2         | 1         |
| 3                          | 1         | 2         | 0         | 1         |
| 4                          | 3         | 4         | 2         | 2         |
| 5                          | 1         | 1         | 2         | 2         |
| 6                          | 2         | 1         | 2         | 3         |
| 7                          | 2         | 1         | 2         | 3         |
| 8                          | 1         | 1         | 1         | 2         |
| 9                          | 1         | 1         | 2         | 2         |
| 10                         | 2         | 2         | 3         | 3         |
| 11                         | 1         | 0         | 0         | 1         |
| 12                         | 2         | 1         | 1         | 2         |
| 13                         | 2         | 2         | 1         | 1         |
| Total Score                | 22        | 23        | 21        | 25        |
