# Supplementary material
Source: publisher figshare collection journal article supplement (https://asha.figshare.com/articles/dataset/_/23971929)
Supplement: Supplementary file 7 [file 1]

**Supplemental Material S9.** Procedural fidelity for SPT (Sound Production Treatment) and Metrical Pacing Therapy (MPT).

| <b>SPT</b>            | <b>Rater (13%; 8 sessions)</b> | <b>PI (90%; 54 sessions)</b> |
|-----------------------|--------------------------------|------------------------------|
| Procedure             | 99.6%                          | 99%                          |
| Number of targets     | 100%                           | 98%                          |
| Articulatory feedback | 100%                           | 99.8%                        |
| <b>MPT</b>            | <b>Rater (13%; 8 sessions)</b> | <b>PI (85%; 51 sessions)</b> |
| Procedure             | 100%                           | 99%                          |
| Number of targets     | 12.5%; 100% with 1/2 set       | 67%; 100% 1/2 set            |
| Fluency feedback      | 99%                            | 98%                          |
| Visual feedback       | 100%                           | 99%                          |
