# Supplementary material
Source: publisher figshare collection journal article supplement (https://asha.figshare.com/articles/dataset/_/23971929)
Supplement: Supplementary file 8 [file 1]

**Supplemental Material S8. Metrical Pacing Therapy protocol.**

| <b>Metrical Pacing Therapy</b>                                                                                                                                                                                                                                                                          |                   |
|---------------------------------------------------------------------------------------------------------------------------------------------------------------------------------------------------------------------------------------------------------------------------------------------------------|-------------------|
| <b>Coded session number</b>                                                                                                                                                                                                                                                                             |                   |
| <b>General observations</b>                                                                                                                                                                                                                                                                             | <b>Plus/minus</b> |
| All 16 targets were treated during the session                                                                                                                                                                                                                                                          |                   |
| The clinician was sitting facing the participant                                                                                                                                                                                                                                                        |                   |
| There was minimal background noise or distraction during the session.                                                                                                                                                                                                                                   |                   |
| Specific cues provided when participant was having difficulty (as seen below)                                                                                                                                                                                                                           |                   |
| Target pacing signal presented at least 6x                                                                                                                                                                                                                                                              |                   |
| Target utterance produced aloud by clinician at least 3x                                                                                                                                                                                                                                                |                   |
| Target utterance produced aloud by the participant across at least 1 repetition of the pacing loop                                                                                                                                                                                                      |                   |
| Any explicit feedback related to articulation of production (e.g., "Try that sound again")? Provide number of trials.                                                                                                                                                                                   |                   |
| <b>Measure</b>                                                                                                                                                                                                                                                                                          | <b>Number</b>     |
| Duration of treatment session                                                                                                                                                                                                                                                                           |                   |
| Number of trials offered in the treatment session                                                                                                                                                                                                                                                       |                   |
| Any trials without visual feedback? Provide number of trials.                                                                                                                                                                                                                                           |                   |
| Additional Comments                                                                                                                                                                                                                                                                                     |                   |
| <p style="text-align: center;"><b>Potential cues</b></p> <ol style="list-style-type: none"> <li>1. Provide hand tapping on table or participant's arm for syllabic onset.</li> <li>2. Produce the target in unison with participant.</li> <li>3. Reduce the signal rate for the participant.</li> </ol> |                   |
